# Supplementary material for: Twelve phosphomimetic mutations induce the assembly of recombinant full-length human tau into paired helical filaments
Source: eLife journal article supplement (doi:10.7554/elife.104778), 2025-01-16
Supplement: fig1-figsupp1-data1 [file elife-104778-fig1-figsupp1-data1-v1.pdf]

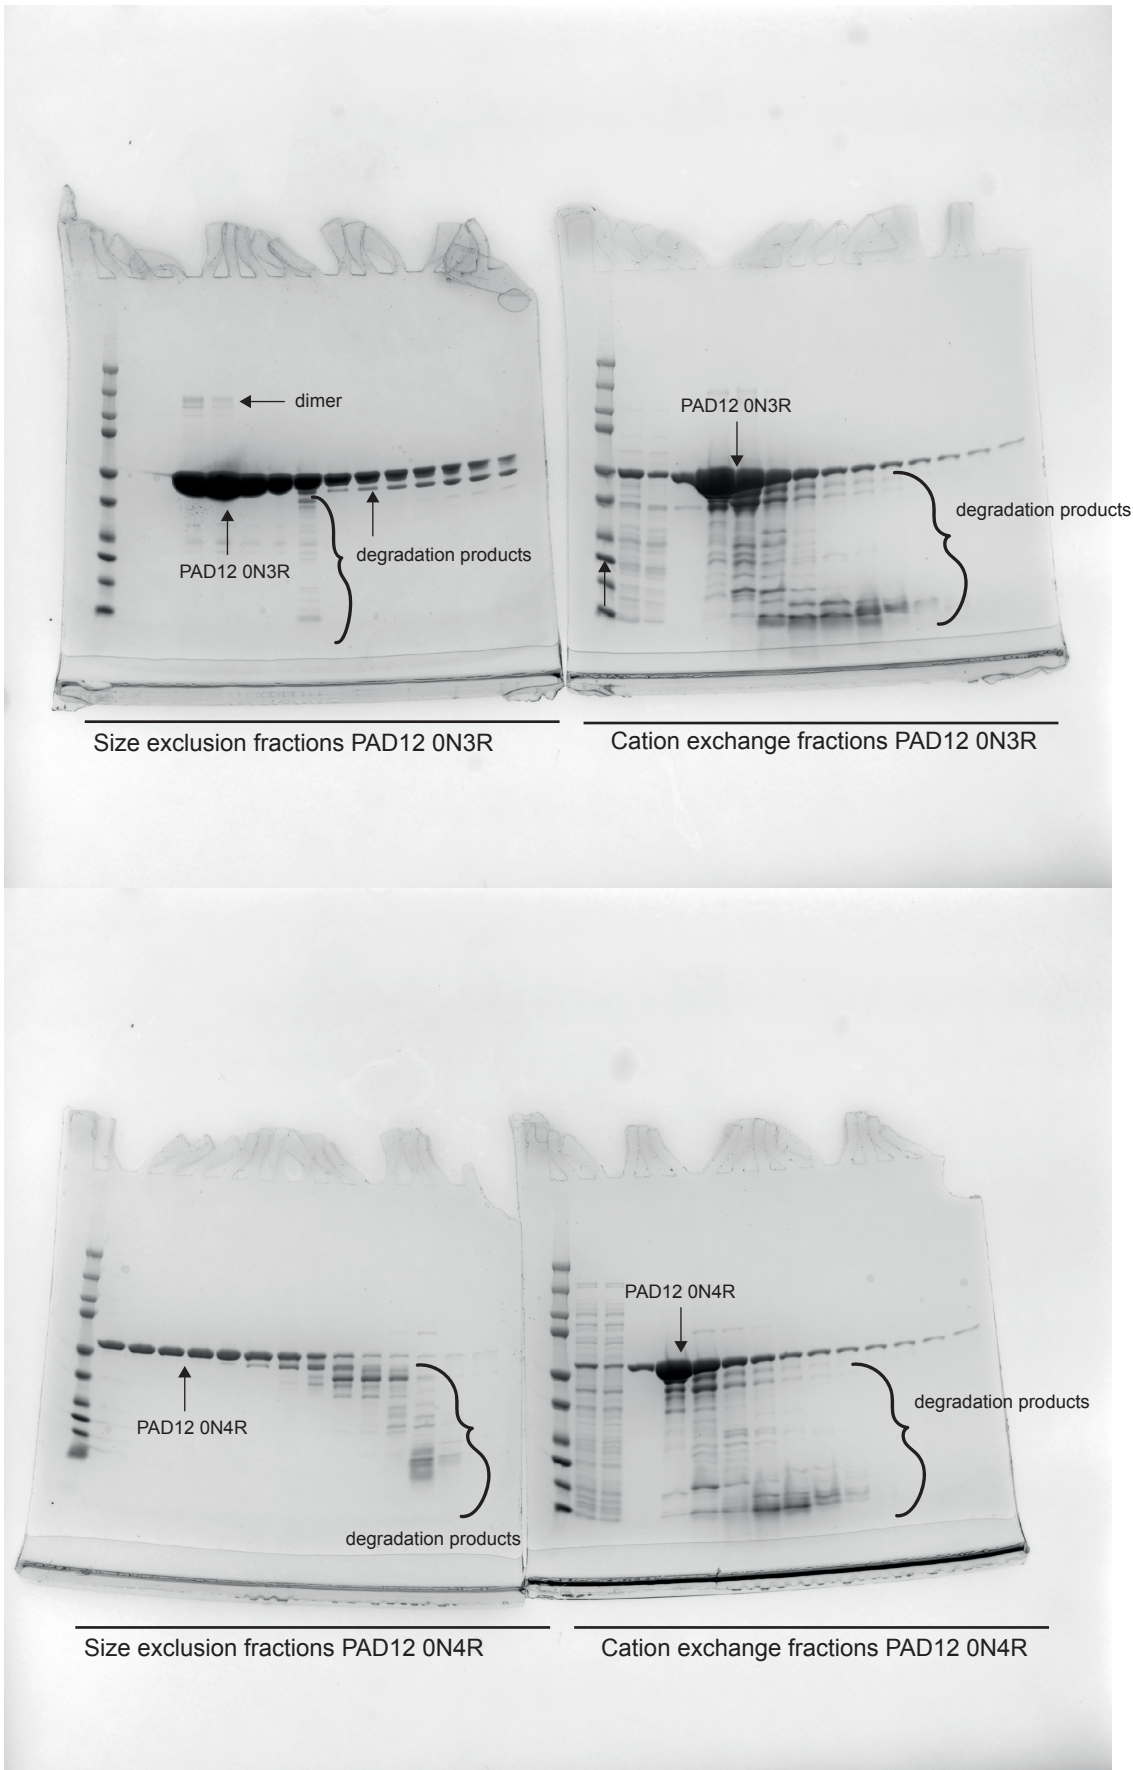

**Source data for Figure 1 - Figure Supplement 1**

Scanned gels for panels C & B (top left & right) and panels F & E (bottom left and right).
